# Supplementary material
Source: Research Square preprint supplement (doi:10.21203/rs.3.rs-9620458/v1)
Supplement: Supplementary file 1 [file bd09bc7241878e27c70e7ee6.docx]

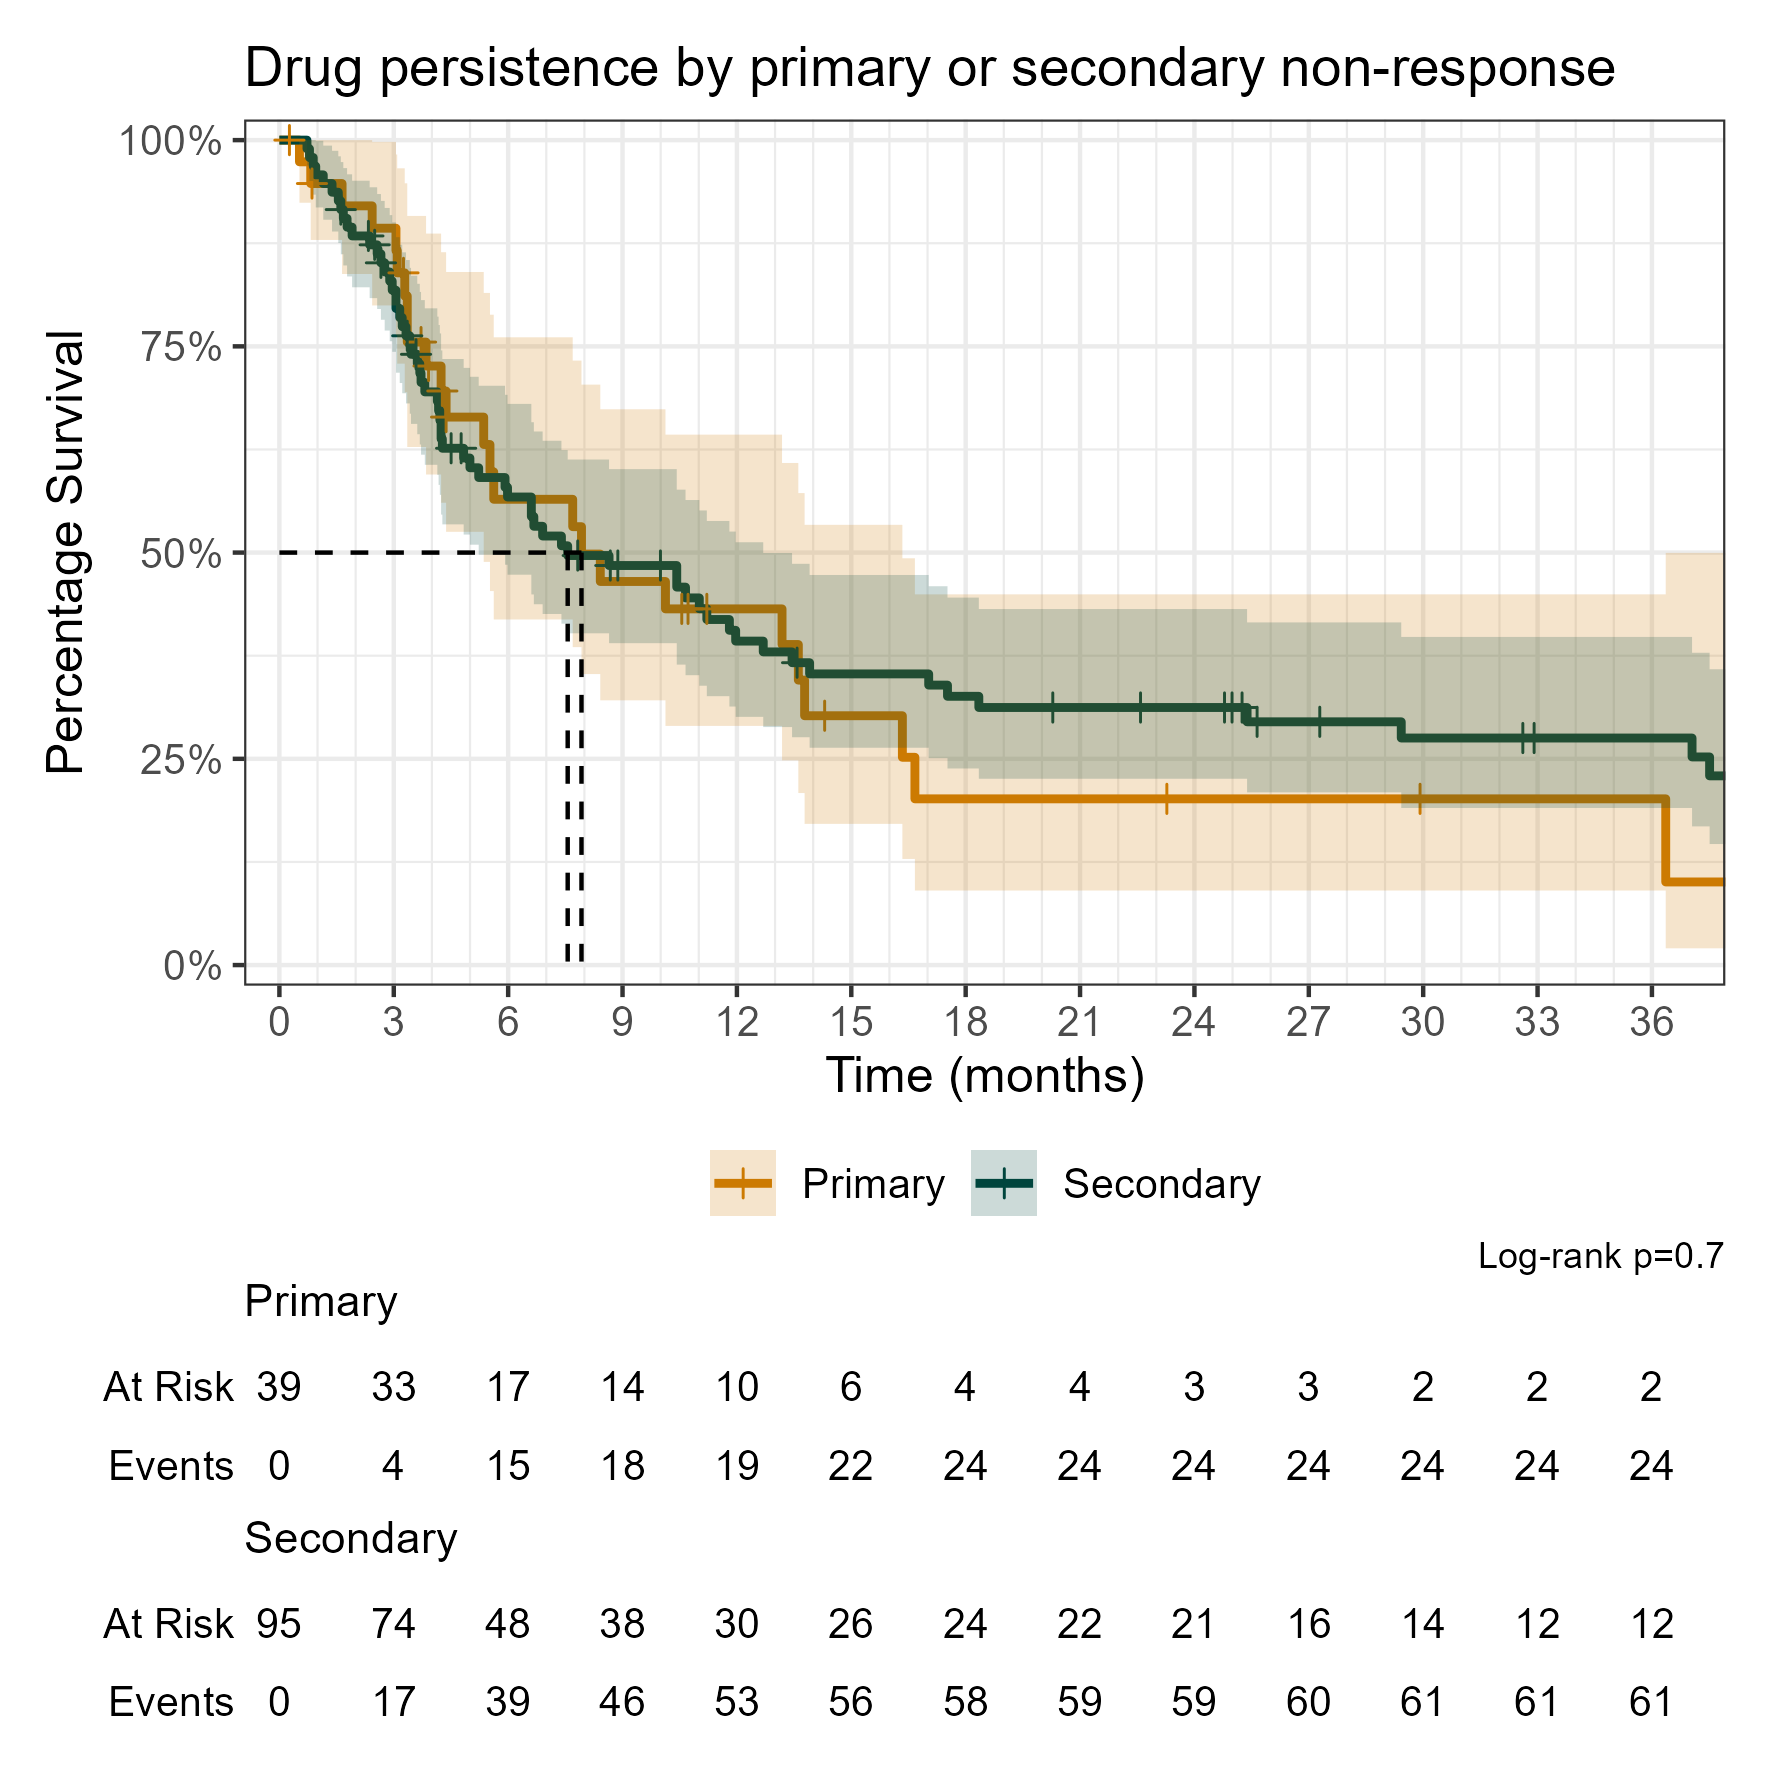

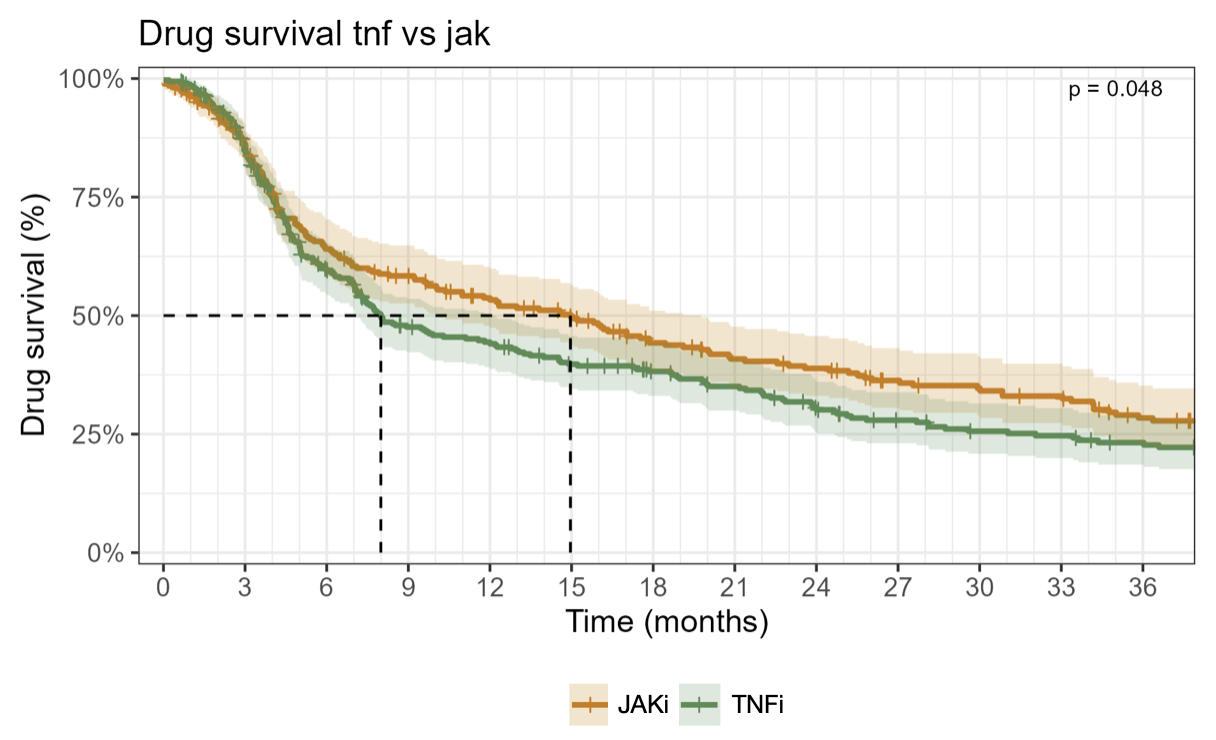


Supplementary Figure S1: Kaplan Meier survival plot including 95% confidence intervals of drug survival in the cycle subcohort for a 36-month period. Drug survival is stratified for primary and secondary non-response, with secondary non-response operationalized as non-response after 9 months.

Supplementary Figure S2: Kaplan Meier survival plot including 95% confidence intervals of drug survival in the switch subcohort for a 36-month period. Drug survival is stratified for use of TNFi and JAKi. p-value was computed using Cox-regression without additional covariates.
